# Supplementary material for: Allergens and Other Harmful Substances in Hydroalcoholic Gels: Compliance with Current Regulation
Source: MDPI journal article supplement (doi:10.3390/mps6050095), 2023-10-07

**Table S1.** Target compounds. CAS number, molecular mass, retention time, MS/MS transitions and restrictions for leave-on cosmetics (EC 1223/2009 regulation) [6].

| Compound                   | CAS number | Molecular mass | Retention time | MS/MS transition (collision energy, eV) <sup>a</sup> |                |      | Restrictions <sup>b</sup>                 |
|----------------------------|------------|----------------|----------------|------------------------------------------------------|----------------|------|-------------------------------------------|
| <i>Fragrance allergens</i> |            |                |                |                                                      |                |      |                                           |
| Pinene                     | 80-56-8    | 136            | 4.28           | 77.1                                                 | → 50.8         | (15) |                                           |
|                            |            |                |                | 92.8                                                 | → 39.0         | (35) |                                           |
|                            |            |                |                | <u>92.8</u>                                          | → <u>77.0</u>  | (10) |                                           |
| Limonene                   | 5989-27-5  | 136            | 6.03           | 67.9                                                 | → 53.0         | (10) | 0.001% <sup>c</sup>                       |
|                            |            |                |                | <u>92.8</u>                                          | → <u>77.0</u>  | (15) |                                           |
|                            |            |                |                | 92.8                                                 | → 91.0         | (10) |                                           |
| Benzyl alcohol             | 100-51-6   | 108            | 6.10           | 79.0                                                 | → 50.9         | (20) | 0.001% <sup>d</sup><br>1.0% <sup>d</sup>  |
|                            |            |                |                | <u>107.1</u>                                         | → <u>79.1</u>  | (10) |                                           |
|                            |            |                |                | 108.2                                                | → 79.1         | (15) |                                           |
| Linalool                   | 78-70-6    | 154            | 7.13           | 71.0                                                 | → 43.0         | (10) | 0.001% <sup>c</sup>                       |
|                            |            |                |                | <u>92.9</u>                                          | → <u>77.0</u>  | (10) |                                           |
|                            |            |                |                | 92.9                                                 | → 91.0         | (10) |                                           |
| Methyl-2-octynoate         | 111-12-6   | 154            | 8.34           | 79.0                                                 | → 77.0         | (10) | 0.001% <sup>c</sup><br>0.01% <sup>e</sup> |
|                            |            |                |                | <u>94.9</u>                                          | → <u>67.0</u>  | (10) |                                           |
|                            |            |                |                | 122.9                                                | → 67.1         | (10) |                                           |
| Citronellol                | 106-22-9   | 156            | 8.61           | <u>67.1</u>                                          | → <u>41.0</u>  | (15) | 0.001% <sup>c</sup>                       |
|                            |            |                |                | 95.0                                                 | → 67.1         | (10) |                                           |
|                            |            |                |                | 123.1                                                | → 81.1         | (10) |                                           |
| Citral                     | 5392-40-5  | 152            | 8.84           | <u>68.9</u>                                          | → <u>41.0</u>  | (10) | 0.001% <sup>c</sup>                       |
|                            |            |                |                | 94.0                                                 | → 79.0         | (10) |                                           |
|                            |            |                |                | 108.9                                                | → 81.0         | (10) |                                           |
| Geraniol                   | 106-24-1   | 154            | 8.84           | 92.9                                                 | → 51.0         | (25) | 0.001% <sup>c</sup>                       |
|                            |            |                |                | <u>92.9</u>                                          | → <u>77.1</u>  | (10) |                                           |
|                            |            |                |                | 110.9                                                | → 93.1         | (5)  |                                           |
| Cinnamaldehyde             | 104-55-2   | 132            | 9.13           | 103.1                                                | → 77.0         | (10) | 0.001% <sup>c</sup>                       |
|                            |            |                |                | 131.1                                                | → 51.0         | (40) |                                           |
|                            |            |                |                | <u>131.1</u>                                         | → <u>77.0</u>  | (25) |                                           |
| Anise alcohol              | 105-13-5   | 138            | 9.20           | <u>109.1</u>                                         | → <u>77.0</u>  | (15) | 0.001% <sup>c</sup>                       |
|                            |            |                |                | 109.1                                                | → 94.0         | (10) |                                           |
|                            |            |                |                | 137.0                                                | → 77.0         | (20) |                                           |
| Cinnamyl alcohol           | 104-54-1   | 134            | 9.40           | <u>92.1</u>                                          | → <u>91.0</u>  | (10) | 0.001% <sup>c</sup>                       |
|                            |            |                |                | 134.1                                                | → 78.0         | (15) |                                           |
|                            |            |                |                | 134.1                                                | → 91.2         | (20) |                                           |
| Eugenol                    | 97-53-0    | 164            | 9.72           | 131.1                                                | → 103.0        | (10) | 0.001% <sup>c</sup>                       |
|                            |            |                |                | <u>164.2</u>                                         | → <u>103.0</u> | (20) |                                           |
|                            |            |                |                | 147.0                                                | → 91.1         | (10) |                                           |
| Methyleugenol              | 93-15-2    | 178            | 10.02          | 163.0                                                | → 107.1        | (10) |                                           |
|                            |            |                |                | <u>178.1</u>                                         | → <u>147.1</u> | (10) |                                           |
|                            |            |                |                | 77.0                                                 | → 50.9         | (15) |                                           |
| Isoeugenol                 | 97-54-1    | 164            | 10.03          | 103.0                                                | → 77.0         | (10) | 0.001% <sup>c</sup><br>0.02% <sup>f</sup> |
|                            |            |                |                | <u>164.1</u>                                         | → <u>149.1</u> | (10) |                                           |
|                            |            |                |                | 107.0                                                | → 91.0         | (10) |                                           |
| $\alpha$ -isomethylionone  | 127-51-5   | 206            | 10.54          | <u>150.1</u>                                         | → <u>91.0</u>  | (20) | 0.001% <sup>c</sup>                       |
|                            |            |                |                | 150.1                                                | → 135.1        | (10) |                                           |
|                            |            |                |                | <u>189.2</u>                                         | → <u>131.1</u> | (10) |                                           |
| Lilial®                    | 80-54-6    | 204            | 10.89          | 204.2                                                | → 147.2        | (10) | Prohibited <sup>g</sup>                   |
|                            |            |                |                | 204.2                                                | → 189.2        | (10) |                                           |
|                            |            |                |                | 116.8                                                | → 115.1        | (10) |                                           |
| Amylcinnamal               | 122-40-7   | 202            | 11.71          | <u>128.9</u>                                         | → <u>128.0</u> | (20) | 0.001% <sup>c</sup>                       |
|                            |            |                |                | 202.0                                                | → 129.1        | (10) |                                           |
|                            |            |                |                | 91.1                                                 | → 65.0         | (15) |                                           |
| Amylcinnamyl alcohol       | 101-85-9   | 204            | 12.01          | <u>133.1</u>                                         | → <u>55.0</u>  | (10) | 0.001% <sup>c</sup>                       |
|                            |            |                |                | 133.1                                                | → 115.1        | (10) |                                           |
|                            |            |                |                | 69.0                                                 | → 39.0         | (15) |                                           |
| Farnesol                   | 4602-84-0  | 222            | 12.03          | 69.0                                                 | → 39.0         | (15) | 0.001% <sup>c</sup>                       |

|                               |            |     |       |              |   |              |             |                         |
|-------------------------------|------------|-----|-------|--------------|---|--------------|-------------|-------------------------|
|                               |            |     |       | <u>69.0</u>  | → | <u>41.0</u>  | <u>(10)</u> |                         |
|                               |            |     |       | 116.8        | → | 91.0         | (15)        |                         |
| Hexylcinnamal                 | 101-86-0   | 216 | 12.56 | <u>129.0</u> | → | <u>127.0</u> | <u>(20)</u> | 0.001% <sup>c</sup>     |
|                               |            |     |       | 216.3        | → | 129.1        | (10)        |                         |
|                               |            |     |       | 90.9         | → | 65.0         | (15)        |                         |
| Benzyl benzoate               | 120-51-4   | 212 | 12.87 | <u>105.1</u> | → | <u>77.0</u>  | <u>(10)</u> | 0.01% <sup>h</sup>      |
|                               |            |     |       | 194.1        | → | 165.1        | (20)        |                         |
|                               |            |     |       | <u>91.0</u>  | → | <u>39.0</u>  | <u>(30)</u> |                         |
| Benzyl salicylate             | 118-58-1   | 228 | 14.14 | 91.0         | → | 65.0         | (15)        | 0.001% <sup>c</sup>     |
|                               |            |     |       | 228.1        | → | 91.0         | (10)        |                         |
|                               |            |     |       | <u>131.1</u> | → | <u>77.0</u>  | <u>(20)</u> |                         |
| Benzyl cinnamate              | 103-41-3   | 238 | 17.94 | 131.1        | → | 103.0        | (10)        | 0.001% <sup>c</sup>     |
|                               |            |     |       | 192.0        | → | 191.2        | (15)        |                         |
| <i><b>Synthetic musks</b></i> |            |     |       |              |   |              |             |                         |
|                               |            |     |       | <u>282.0</u> | → | <u>265.1</u> | <u>(10)</u> |                         |
| Musk Xylene                   | 81-15-2    | 297 | 13.80 | 282.1        | → | 90.8         | (35)        | 0.03% <sup>i</sup>      |
|                               |            |     |       | 253.1        | → | 105.9        | (10)        |                         |
| Musk Ambrette                 | 83-66-9    | 268 | 11.39 | 253.1        | → | 119.9        | (10)        | Prohibited <sup>s</sup> |
|                               |            |     |       | <u>268.1</u> | → | <u>253.1</u> | <u>(5)</u>  |                         |
|                               |            |     |       | <u>263.1</u> | → | <u>127.8</u> | <u>(40)</u> |                         |
| Musk Moskene                  | 116-66-5   | 278 | 14.08 | 263.1        | → | 200.9        | (10)        | Prohibited <sup>s</sup> |
|                               |            |     |       | 263.1        | → | 221.1        | (10)        |                         |
|                               |            |     |       | 251.1        | → | 159.9        | (10)        |                         |
| Musk Tibetene                 | 145-39-1   | 266 | 14.84 | <u>266.3</u> | → | <u>251.2</u> | <u>(5)</u>  | Prohibited <sup>s</sup> |
|                               |            |     |       | <u>213.2</u> | → | <u>171.2</u> | <u>(10)</u> |                         |
| Galaxolide                    | 1222-05-5  | 258 | 13.70 | 243.2        | → | 198.2        | (20)        |                         |
|                               |            |     |       | 243.2        | → | 213.2        | (10)        |                         |
|                               |            |     |       | 229.3        | → | 173.1        | (10)        |                         |
| Celestolide                   | 13171-00-1 | 244 | 12.22 | 244.2        | → | 173.1        | (15)        |                         |
|                               |            |     |       | <u>244.2</u> | → | <u>229.2</u> | <u>(10)</u> |                         |
|                               |            |     |       | 187.0        | → | 145.2        | (10)        |                         |
| Phantolide                    | 15323-35-0 | 244 | 12.61 | 229.2        | → | 187.0        | (10)        | 2% <sup>j</sup>         |
|                               |            |     |       | <u>244.2</u> | → | <u>229.2</u> | <u>(10)</u> |                         |
|                               |            |     |       | 163.1        | → | 107.1        | (10)        |                         |
| Cashmeran                     | 33704-61-9 | 206 | 10.74 | <u>191.1</u> | → | <u>135.1</u> | <u>(10)</u> |                         |
|                               |            |     |       | 206.2        | → | 191.2        | (10)        |                         |
|                               |            |     |       | 173.0        | → | 131.1        | (10)        |                         |
| Traseolide                    | 68140-48-7 | 258 | 13.73 | <u>215.2</u> | → | <u>173.1</u> | <u>(10)</u> |                         |
|                               |            |     |       | 258.2        | → | 215.2        | (10)        |                         |
|                               |            |     |       | <u>187.1</u> | → | <u>43.0</u>  | <u>(15)</u> |                         |
| Tonalide                      | 1506-02-1  | 258 | 13.77 | 243.2        | → | 159.2        | (10)        | 1% <sup>k</sup>         |
|                               |            |     |       | 258.2        | → | 187.2        | (10)        |                         |
|                               |            |     |       | <u>95.9</u>  | → | <u>81.1</u>  | <u>(10)</u> |                         |
| Ambrettolide                  | 7779-50-2  | 252 | 15.02 | 108.9        | → | 67.1         | (10)        |                         |
|                               |            |     |       | 108.9        | → | 81.0         | (10)        |                         |
| <i><b>Preservatives</b></i>   |            |     |       |              |   |              |             |                         |
|                               |            |     |       | 94.0         | → | 65.1         | (15)        |                         |
| Phenoxyethanol (PhEtOH)       | 122-99-6   | 138 | 8.59  | 94.0         | → | 65.8         | (10)        | 1.0% <sup>l</sup>       |
|                               |            |     |       | <u>138.0</u> | → | <u>94.1</u>  | <u>(10)</u> |                         |
|                               |            |     |       | 121.0        | → | 93.1         | (10)        |                         |
| Butylhydroxyanisole (BHA)     | 25013-16-5 | 180 | 10.60 | 152.0        | → | 121.1        | (10)        |                         |
|                               |            |     |       | <u>137.1</u> | → | <u>77.1</u>  | <u>(20)</u> |                         |
|                               |            |     |       | 165.2        | → | 137.1        | (10)        |                         |
| Butylhydroxytoluene (BHT)     | 128-37-0   | 220 | 10.70 | 180.1        | → | 165.1        | (10)        | 0.8% <sup>m</sup>       |
|                               |            |     |       | <u>205.1</u> | → | <u>145.1</u> | <u>(15)</u> |                         |
|                               |            |     |       | 138.0        | → | 121.1        | (10)        |                         |
| Triclosan (TCS)               | 3380-34-5  | 290 | 18.00 | <u>218.0</u> | → | <u>126.9</u> | <u>(30)</u> |                         |
|                               |            |     |       | 288.0        | → | 218.0        | (15)        |                         |
|                               |            |     |       | 152.0        | → | 121.1        | (10)        |                         |
| Methyl paraben (MeP)          | 99-76-3    | 152 | 10.44 | 121.0        | → | 93.1         | (10)        | 0.4% <sup>n</sup>       |

|                                 |            |     |       |              |   |              |             |                         |
|---------------------------------|------------|-----|-------|--------------|---|--------------|-------------|-------------------------|
|                                 |            |     |       | <u>121.0</u> | → | <u>65.1</u>  | <u>(15)</u> |                         |
|                                 |            |     |       | 121.0        | → | 93.1         | (10)        |                         |
| Ethyl paraben (EtP)             | 120-47-8   | 166 | 10.86 | 138.0        | → | 121.0        | (10)        | 0.4% <sup>n</sup>       |
|                                 |            |     |       | <u>121.0</u> | → | <u>65.1</u>  | <u>(15)</u> |                         |
|                                 |            |     |       | 121.0        | → | 93.1         | (10)        |                         |
| Isopropyl paraben (iPrP)        | 4191-73-5  | 180 | 11.03 | <u>138.0</u> | → | <u>121.0</u> | <u>(10)</u> | Prohibited <sup>s</sup> |
|                                 |            |     |       | 121.0        | → | 65.1         | (15)        |                         |
|                                 |            |     |       | 121.0        | → | 93.1         | (10)        |                         |
| Propyl paraben (PrP)            | 94-13-3    | 180 | 11.52 | <u>138.1</u> | → | <u>121.0</u> | <u>(10)</u> | 0.14% <sup>o</sup>      |
|                                 |            |     |       | 121.0        | → | 65.0         | (15)        |                         |
|                                 |            |     |       | 138.0        | → | 121.0        | (10)        |                         |
| Isobutyl paraben (iBuP)         | 4247-02-3  | 194 | 11.97 | <u>121.1</u> | → | <u>65.1</u>  | <u>(15)</u> | Prohibited <sup>s</sup> |
|                                 |            |     |       | 121.1        | → | 93.1         | (10)        |                         |
|                                 |            |     |       | <u>121.0</u> | → | <u>65.1</u>  | <u>(20)</u> |                         |
| Benzyl paraben (BzP)            | 94-18-8    | 228 | 18.48 | 121.0        | → | 93.1         | (10)        | Prohibited <sup>s</sup> |
|                                 |            |     |       | 228.2        | → | 121.1        | (10)        |                         |
| <i>Plasticizers</i>             |            |     |       |              |   |              |             |                         |
|                                 |            |     |       | <u>163.0</u> | → | <u>77.1</u>  | <u>(20)</u> |                         |
| Dimethyl phthalate (DMP)        | 131-11-3   | 194 | 10.37 | 163.0        | → | 133.1        | (10)        |                         |
|                                 |            |     |       | 163.0        | → | 135.1        | (10)        |                         |
|                                 |            |     |       | <u>149.0</u> | → | <u>121.1</u> | <u>(10)</u> |                         |
| Diethyl phthalate (DEP)         | 84-66-2    | 222 | 11.26 | 176.7        | → | 149.1        | (10)        |                         |
|                                 |            |     |       | <u>149.0</u> | → | <u>65.0</u>  | <u>(25)</u> |                         |
| Diisobutyl phthalate (DIBP)     | 84-69-5    | 278 | 13.79 | 149.0        | → | 121.0        | (15)        | Prohibited <sup>s</sup> |
|                                 |            |     |       | 223.1        | → | 149.0        | (10)        |                         |
|                                 |            |     |       | <u>149.0</u> | → | <u>65.1</u>  | <u>(20)</u> |                         |
| Dibutyl phthalate (DBP)         | 84-74-2    | 278 | 15.27 | 149.0        | → | 93.0         | (15)        | Prohibited <sup>s</sup> |
|                                 |            |     |       | 149.0        | → | 121.0        | (10)        |                         |
|                                 |            |     |       | 104.2        | → | 76.0         | (10)        |                         |
| Dimethoxyethyl phthalate (DMEP) | 117-82-8   | 282 | 15.94 | <u>148.9</u> | → | <u>65.0</u>  | <u>(20)</u> | Prohibited <sup>s</sup> |
|                                 |            |     |       | 148.9        | → | 121.0        | (10)        |                         |
|                                 |            |     |       | <u>149.0</u> | → | <u>93.0</u>  | <u>(15)</u> |                         |
| Diisopentyl phthalate (DIPP)    | 605-50-5   | 306 | 17.21 | 149.0        | → | 121.0        | (15)        | Prohibited <sup>s</sup> |
|                                 |            |     |       | 237.1        | → | 149.0        | (10)        |                         |
|                                 |            |     |       | <u>149.0</u> | → | <u>65.0</u>  | <u>(25)</u> |                         |
| Dipentyl phthalate (DPP)        | 131-18-0   | 306 | 18.46 | 149.0        | → | 93.0         | (15)        | Prohibited <sup>s</sup> |
|                                 |            |     |       | 149.0        | → | 121.0        | (15)        |                         |
|                                 |            |     |       | 149.0        | → | 65.1         | (20)        |                         |
| Benzylbutyl phthalate (BBP)     | 85-68-7    | 312 | 20.11 | 149.0        | → | 93.0         | (15)        | Prohibited <sup>s</sup> |
|                                 |            |     |       | <u>205.9</u> | → | <u>149.1</u> | <u>(10)</u> |                         |
|                                 |            |     |       | <u>149.0</u> | → | <u>65.0</u>  | <u>(25)</u> |                         |
| Diisohetpty phthalate (DIHP)    | 41451-28-9 | 362 | 20.78 | 149.0        | → | 121.0        | (15)        |                         |
|                                 |            |     |       | 265.1        | → | 149.0        | (10)        |                         |
|                                 |            |     |       | 149.0        | → | 93.0         | (15)        |                         |
| Diethylhexyl phthalate (DEHP)   | 117-81-7   | 390 | 21.07 | 149.0        | → | 121.0        | (15)        | Prohibited <sup>s</sup> |
|                                 |            |     |       | <u>279.1</u> | → | <u>149.1</u> | <u>(10)</u> |                         |
|                                 |            |     |       | 149.0        | → | 65.0         | (25)        |                         |
| Dicyclohexyl phthalate (DCHP)   | 84-61-7    | 330 | 21.03 | 149.0        | → | 93.0         | (15)        | Prohibited <sup>s</sup> |
|                                 |            |     |       | <u>249.1</u> | → | <u>149.1</u> | <u>(15)</u> |                         |
|                                 |            |     |       | <u>225.0</u> | → | <u>77.0</u>  | <u>(20)</u> |                         |
| Diphenyl phthalate (DPhP)       | 84-62-8    | 318 | 21.18 | 225.0        | → | 115.0        | (30)        |                         |
|                                 |            |     |       | 225.0        | → | 152.8        | (10)        |                         |
|                                 |            |     |       | <u>149.0</u> | → | <u>93.0</u>  | <u>(15)</u> |                         |
| Di-n-octyl phthalate (DnOP)     | 117-84-0   | 390 | 22.20 | 149.0        | → | 121.0        | (15)        |                         |
|                                 |            |     |       | <u>111.0</u> | → | <u>83.0</u>  | <u>(10)</u> |                         |
| Dimethyl adipate (DMA)          | 627-93-0   | 174 | 8.74  | 114.0        | → | 71.0         | (15)        |                         |
|                                 |            |     |       | 114.0        | → | 113.0        | (10)        |                         |
|                                 |            |     |       | 128.3        | → | 99.0         | (10)        |                         |
| Diethyl adipate (DEA)           | 141-28-6   | 202 | 9.88  | 157.0        | → | 83.0         | (15)        |                         |
|                                 |            |     |       | <u>157.0</u> | → | <u>111.0</u> | <u>(5)</u>  |                         |

|                                |          |     |       |                                |             |                               |                     |
|--------------------------------|----------|-----|-------|--------------------------------|-------------|-------------------------------|---------------------|
| Diethylhexyl adipate<br>(DEHA) | 103-23-1 | 370 | 20.31 | 129.0<br><u>129.0</u><br>146.9 | →<br>→<br>→ | 83.0<br><u>101.0</u><br>101.0 | (10)<br>(5)<br>(10) |
|--------------------------------|----------|-----|-------|--------------------------------|-------------|-------------------------------|---------------------|

<sup>a</sup> Underlined MS/MS transition is the selected for quantification.

<sup>b</sup> Cosmetic Regulation (EU) N° 1223/2009. Current consolidated version: 17/12/2022.

<sup>c</sup> The presence of the substance must be indicated in the list of ingredients when its concentration exceeds: **0.001% in leave-on products** and 0.01% in rinse-off products.

<sup>d</sup> For purposes other than inhibiting the development of microorganisms in the fragrance/ aromatic compositions/ raw materials. the presence of the substance must be indicated in the list of ingredients when its concentration exceeds **0.001% in leave-on products** and 0.01% in rinse-off products. As a preservative. its maximum permitted concentration in final product is **1.0%**.

<sup>e</sup> Maximum permitted concentration in final product: **0.01%**.

<sup>f</sup> Maximum permitted concentration in final products except oral products: **0.02%**.

<sup>g</sup> Prohibited substances in cosmetic products are collected in the Annex II. The European Cosmetics legislation also prohibits the use of substances classified as carcinogenic, mutagenic and reprotoxic (CMR) hazards (Article 15).

<sup>h</sup> The presence of the substance must be indicated in the list of ingredients when its concentration exceeds: **0.01% in leave-on products** and in rinse-off products.

<sup>i</sup> All cosmetic products with the exception of oral products. Maximum permitted concentration in final products: 1.0% in fine fragrance. 0.4% in eau de toilette and **0.03% in other products**.

<sup>j</sup> Maximum concentration in **leave-on products: 2%** and no limit in rinse-off products.

<sup>k</sup> Maximum permitted concentration in final leave-on products: 0.1%. except **hydroalcoholic products 1%**. fine fragrance 2.5%. fragrance cream 0.5%. In rinse-off products: 0.2%.

<sup>l</sup> Maximum permitted concentration in final products: **1.0%**.

<sup>m</sup> Maximum permitted concentration in mouthwash is 0.001%. in toothpaste 0.1% and in other **leave-on** and rinse-off products **0.8%**.

<sup>n</sup> Maximum concentration is **0.4% (as acid) for single ester** and 0.8% (as acid) for mixtures of ester.

<sup>o</sup> Maximum concentration is **0.14% (as acid) for individual esters** and 0.8% (as acid) for mixtures of esters. where the sum of their individual concentrations does not exceed 0.14%. Not to be used in leave-on products designed for application on the nappy area of children under three years of age.

**Table S2.** Information of the analyzed samples including the composition indicated on the label.

| Code | Sampling date and place   | Name                                                                    | Composition declared on the label                                                                                                                                                                                                        |
|------|---------------------------|-------------------------------------------------------------------------|------------------------------------------------------------------------------------------------------------------------------------------------------------------------------------------------------------------------------------------|
| G1   | 9/11/2020<br>Personal use | Hands gel cleaner. Leave-on product.                                    | Alcohol denat, water, polysorbate-20, propylene, glycol, <b>fragrance (parfum)</b> , aloe barbadensis leaf juice, glycerin, triethanolamine, carbomer, tocopheryl acetate (vitamin E acetate), hydroxypropylethyl cellulose, C.I. 14700. |
| G2   | 9/11/2020<br>Personal use | Sanitizer hydroalcoholic gel. Alcohol 70%. Hands cleaner without water. | Alcohol denat (70%), aqua (water), glycerin, acrylates / C 10-30 Alkyl Acrylate Crosspolymer, PEG-40 Hydrogenated Castor Oil, triethanolamine, CI 42090 (FD & Blue 1).                                                                   |

|     |                              |                                                                                     |                                                                                                                                                                                                                                                                                                                                                           |
|-----|------------------------------|-------------------------------------------------------------------------------------|-----------------------------------------------------------------------------------------------------------------------------------------------------------------------------------------------------------------------------------------------------------------------------------------------------------------------------------------------------------|
| G3  | 9/11/2020<br>Supermarket     | Sanitizer<br>hydroalcoholic<br>gel. 70% of<br>alcohol.                              | Alcohol denat, aqua (water), isopropyl<br>alcohol, glycerin, carbomer, triethanolamine.                                                                                                                                                                                                                                                                   |
| G4  | 9/11/2020<br>Local store     | Hydroalcoholic<br>gel with aloe<br>vera and algae.                                  | Alcohol, aqua (water), isopropyl alcohol,<br>glycerin, <b>parfum</b> , acrylates copolymer, aloe<br>barbadensis leaf extract, triethanolamine,<br>fucus vesiculosus extract, sodium benzoate,<br>potassium sorbate, CI 42090, CI 19140, sodium<br>chloride, citric acid.                                                                                  |
| G5  | 9/11/2020<br>Local store     | Hands<br>hydroalcoholic<br>gel. 70% of<br>alcohol.                                  | Alcohol denat, aqua (water), glycerin,<br><b>phenoxyethanol</b> , aloe barbadensis leaf juice,<br>didecylidimonium chloride, C.I. 42090.                                                                                                                                                                                                                  |
| G6  | 15/11/2020<br>Local store    | Gel<br>higienizante de<br>manos sin<br>aclarado.<br>Alcohol 80%.                    | Alcohol denat, aqua (water), glycerin,<br>ammonium polyacryloyldimethyltaurate,<br>ethanolamine.                                                                                                                                                                                                                                                          |
| G7  | 15/11/2020<br>Bank           | Hydroalcoholic<br>gel. Antiseptic<br>for healthy<br>skin. Hands<br>disinfectant.    | Composition for 100 g:<br>Ethanol, 75 g.<br>Water and excipients, c.s.p. 100 g.                                                                                                                                                                                                                                                                           |
| G8  | 17/11/2020<br>Personal use   | Antiseptic<br>hydroalcoholic<br>gel for healthy<br>skin.                            | 75% (v/v) ethanol, 0.1% (w/w), C12-16-<br>Benzyl dimethyldecylammonium chloride,<br>limonene, hexylcinnamal, hydroxycitronellal.                                                                                                                                                                                                                          |
| G9  | 17/11/2020<br>Personal use   | Hydroalcoholic<br>gel 75%. Hand<br>sanitizer with<br>aloe vera and<br>without water | Alcohol, aqua (water), glycerin, carbopol, aloe,<br>parfum, aminomethyl propanol.                                                                                                                                                                                                                                                                         |
| G10 | 17/11/2020<br>Personal use   | Hand cleaner.<br>Hydroalcoholic<br>gel.                                             | Alcohol denat, aqua (water, eau),<br>hydroxyethyl urea, parfum (fragrance),<br>acrylates/C10-30 alkyl acrylate crosspolymer,<br>ethanolamine, hexyl laurate, polysorbate 80,<br>benzophenone-1, butylphenyl<br>methylpropional (lilial), linalool, citronellol,<br>hexyl cinnamal, benzyl salicylate, benzyl<br>alcohol, ethyl benzoate, methyl benzoate. |
| G11 | Restaurant<br>(17/11/2020)   | Hand sanitizer.                                                                     | Alcohol, isopropyl alcohol, gliceryn,<br>hydroxyethylcellulose.                                                                                                                                                                                                                                                                                           |
| G12 | Personal use<br>(04/10/2021) | Hydroalcoholic<br>gel 70 %.                                                         | Alcohol, aqua, isopropyl alcohol, aloe<br>barbadensis leaf juice, glycerin, carbomer,<br>triethanolamine.                                                                                                                                                                                                                                                 |
| G13 | Personal use<br>(04/10/2021) | Hydroalcoholic<br>gel for hands<br>sanitising and<br>disinfecting                   | Ethanol 54.3 g excipients and water c.s.p. 100<br>g. Limonene, linalool, citral, geraniol,<br>hydroxycitronellal.                                                                                                                                                                                                                                         |

|            |                               |                                                                |                                                                                                                                                                                                                                                                                                                                               |
|------------|-------------------------------|----------------------------------------------------------------|-----------------------------------------------------------------------------------------------------------------------------------------------------------------------------------------------------------------------------------------------------------------------------------------------------------------------------------------------|
| <b>G14</b> | Personal use<br>(04/10/2021)  | Hydroalcoholic<br>product                                      | Alcohol denat (70 %), aqua (water), glycerin,<br>acrylates C10-30 Alkyl Acrylate C osspolymer,<br>PEG-40 Hydrogenated Castor Oil,<br>Triethanolamine, CI 42090 (FD & Blue 1).                                                                                                                                                                 |
| <b>G15</b> | 04/10/2021<br>Personal use    | Antiseptic for<br>healthy skin                                 | Ethanol 75 % (v/v), 0.1 % (w/w)<br>Benzyl dimethyldecylammonium chloride,<br>limonene, hexylcinnamal.                                                                                                                                                                                                                                         |
| <b>G16</b> | Personal use<br>(05/10/2021)  | Hydroalcoholic<br>solution                                     | Alcohol denat 80 % (v/v), aqua, glycerin,<br>hydrogen peroxide.                                                                                                                                                                                                                                                                               |
| <b>G17</b> | Personal use<br>(03/10/2021)  | Hands gel.<br>Antiseptic for<br>healthy skin.<br>Desinfectant. | Ethanol 78 % (w/w), hexylcinnamal,<br>amylcinnamal, limonene, linalool, geraniol,<br>citronellol.                                                                                                                                                                                                                                             |
| <b>G18</b> | Personal use<br>(03/10/2021)  | Hydroalcoholic<br>gel                                          | Alcohol denat 72.5 % (v/v), aqua (water),<br>glycerin, propylene glycol, ammonium<br>polyacryloyldimethyl, taurate, parfum,<br>limonene, linalool.                                                                                                                                                                                            |
| <b>G19</b> | Personal use<br>(03/10/2021)  | Hydroalcoholic<br>solution                                     | Alcohol denat, aqua (water), glycerin,<br>benzalkonium chloride, parfum.                                                                                                                                                                                                                                                                      |
| <b>G20</b> | Personal use<br>(04/10/2021)  | Hands gel<br>cleaner                                           | Alcohol denat, water, polysorbate-20,<br>propyleneglycol, fragrance (parfum), aloe<br>barbadensis leaf juice, glycerin,<br>triethanolamine, carbomer, tocopheryl acetate<br>(vitamin E acetate), hydroxypropylethyl<br>cellulose.                                                                                                             |
| <b>G21</b> | Hospital<br>(07/12/2021)      | Antiseptic for<br>healthy skin.<br>Hydroalcoholic<br>gel       | Ethanol (700 mg/g or 755 mL/L) in the<br>presence of thickening agents, moisturisers,<br>emollients and water.                                                                                                                                                                                                                                |
| <b>G22</b> | Shop<br>(17/12/2021)          | Antiseptic<br>hydroalcoholic<br>gel for healthy<br>skin        | Ethanol(70%), phenoxyethanol (2.1 %)<br>,didecyl dimethylammonium chloride (0.35%)<br>UNE-EN 1276, UNE-EN 1650, UNE-EN 14476,<br>UNE-EN 12791, UNE-EN 13624, UNE-EN<br>14348, UNE-EN 13727                                                                                                                                                    |
| <b>G23</b> | Personal use<br>(18/12/21)    | Hygiene foam                                                   | Aqua (water), sodium laureth sulfate, sodium<br>lauryl sulfate, citric acid, coco glucoside,<br>glyceril oleate, citrus limon (lemon) peel oil,<br><b>limonene</b> , sodium benzoate, eucalyptus<br>globulus leaf oil, copper sulfate, lactic acid,<br>potassium sorbate, <b>citral</b> , tocopherol,<br>hydrogenated palm glycerides citrate |
| <b>G24</b> | Car dealer<br>(01/02/22)      | Solution for<br>skin cleaning                                  | Alcohol, aqua, glycerin, propylene glycol, aloe<br>barbadensis extract, parfum, carbomer,<br>triethanolamine, tocopherol, citral, geraniol,<br>benzyl benzoate, citronellol, limonene, linalool                                                                                                                                               |
| <b>G25</b> | Optics<br>(05/02/22)          | Hand sanitiser                                                 | Alcohol denat, aqua, glycerin, carbomer,<br>triethanolamine, aloe barbadensis leaf extract                                                                                                                                                                                                                                                    |
| <b>G26</b> | Shopping centre<br>(05/02/22) | Hygienic hand<br>rub                                           | Ethanol 700 mL/L (556.5 g/L)                                                                                                                                                                                                                                                                                                                  |
| <b>G27</b> | Restaurant<br>(03/02/22)      | Hydroalcoholic<br>solution                                     | Ethanol (72% w/w)                                                                                                                                                                                                                                                                                                                             |

|            |                              |                                                                           |                                                                                                                                                                                                                                                                                                                                                                                                                                                                                            |
|------------|------------------------------|---------------------------------------------------------------------------|--------------------------------------------------------------------------------------------------------------------------------------------------------------------------------------------------------------------------------------------------------------------------------------------------------------------------------------------------------------------------------------------------------------------------------------------------------------------------------------------|
| <b>G28</b> | Optics<br>(03/02/22)         | Hydroalcoholic gel                                                        | Alcohol denat, water, aloe barbadensis leaf juice, glycerin, isopropyl alcohol, glyceryl cocoate, triethanolamine, fragrance (parfum), benzyl salicylate, hexyl cinnamal, limonene, linalool, potassium sorbate, sodium benzoate, sodium sulfite, acrylates/C10-30 alkyl acrylate crosspolymer                                                                                                                                                                                             |
| <b>G29</b> | Dentist<br>(04/02/22)        | Hand sanitiser                                                            | Alcohol denat, water, hydroxyethylcellulose, parfum, benzalkonium chloride, disodium phosphate, polysorbate 60, sodium phosphate, limonene, linalool                                                                                                                                                                                                                                                                                                                                       |
| <b>G30</b> | Personal use<br>(04/02/22)   | Hydroalcoholic gel                                                        | Alcohol denat, water, glycerin, propylene glycol, ammonium polyacryloyldimethyl taurate, parfum, limonene, linalool                                                                                                                                                                                                                                                                                                                                                                        |
| <b>G31</b> | Personal use<br>(06/02/22)   | Hydroalcoholic gel for hands sanitising.                                  | Alcohol denat, water, aloe barbadensis, phenoxyethanol, acrylates/C10-30 alkyl acrylate crosspolymer, amonomehyl propanol. Benzalkonium chloride, chlorhexidine digluconate, glyceryl cocoate                                                                                                                                                                                                                                                                                              |
| <b>G32</b> | Post office<br>(09/02/22)    | Hygienic hands gel                                                        | Alcohol denat, aqua, acrylates/C10-30 alkyl acrylate crosspolymer, aloe barbadensis leaf juice, glycerin, isopropyl alcohol, PEG-7 glyceryl cocoate, triethanolamine, parfum, benzyl salicylate, hexyl cinnamal, limonene, linalool, potassium sorbate, sodium benzoate, sodium sulfite                                                                                                                                                                                                    |
| <b>G33</b> | Shop (09/11/20)              | Hand sanitizer                                                            | Alcohol denat, aqua, glycerin, phenoxyethanol, aloe barbadensis leaf juice, didecyldimonium chloride, C.I. 42090. Absence of parfum                                                                                                                                                                                                                                                                                                                                                        |
| <b>G34</b> | Personal use<br>(17/11/20)   | Hydroalcoholic gel for hand antisepsis                                    | Alcohol denat, aqua/water, glycerin, ammonium polyacryloyldimethyl taurate                                                                                                                                                                                                                                                                                                                                                                                                                 |
| <b>G35</b> | Restaurant<br>(11/02/2022)   | Hydroalcoholic lotion for healthy skin and pre-surgical hand disinfection | Ethanol 70% w/w, phenoxyethanol 2.1% w/w, didecyldimethylammonium chloride 0.35% w/w, UNE-EN 1276, UNE-EN 1650, UNE-EN 14476, UNE-EN 12791, UNE-EN 13624, UNE-EN 14348, UNE-EN 13727                                                                                                                                                                                                                                                                                                       |
| <b>G36</b> | Personal use<br>(15/02/2022) | No-rinse hand cleansing gel                                               | Alcohol denat, aqua (water), glycerin, PEG-40 hydrogenated castor oil, acrylates/C10-30 alkyl acrylate crosspolymer, parfum (fragrance), tromethamine, limonene, PEG-30 dipolyhydroxystearate, trideceth-6, butyl methoxydibenzoylmethane, ethylhexyl methoxybenzoylmethane, ethylhexyl methoxycinnamate, PPG-26-Buteth-26, citrus paradisi (grapefruit) juice, linalool, ethylhexyl salicylate, citral, potassium sorbate, CI 14700 (Red 4), CI 17200 (Red 33), CI 19140 (Yellow 5), BHT. |

|            |                                            |                                                                           |                                                                                                                                                                                                                                              |
|------------|--------------------------------------------|---------------------------------------------------------------------------|----------------------------------------------------------------------------------------------------------------------------------------------------------------------------------------------------------------------------------------------|
| <b>G37</b> | Restaurant<br>(11/02/22)                   | Hydroalcoholic lotion for healthy skin and pre-surgical hand disinfection | Ethanol 70% w/w, phenoxyethanol 2.1% w/w, didecyldimethylammonium chloride 0.35% w/w, UNE-EN 1500, UNE-EN 1276, UNE-EN 1650, UNE-EN 14476, UNE-EN 12791, UNE-EN 13624, UNE-EN 14348, UNE-EN 13727                                            |
| <b>G38</b> | Shop<br>(11/02/22)                         | Hydroalcoholic gel                                                        | Isopropyl alcohol (70% w/w), excipient, aqua (csp 100%).                                                                                                                                                                                     |
| <b>G39</b> | School<br>(09/02/2022)                     | Hands hydroalcoholic gel                                                  | Aqua, alcohol, isopropyl alcohol, gliceryn, hydroxyethylcellulose                                                                                                                                                                            |
| <b>G40</b> | Book store<br>(16/02/2022)                 | Hands hydroalcoholic gel                                                  | Alcohol denat, aqua, glycerin, carbomer, propylene glycol, aloe barbadensis leaf extract, aminomethyl propanol, potassium sorbate, parfum                                                                                                    |
| <b>G41</b> | Restaurant/dentist<br>(17/02/2022)         | Hand cleaner gel                                                          | Alcohol denat, aqua, glycerin, aloe barbadensis leaf juice, acrylates/C10-30 alkyl acrylate crosspolymer, parfum, citric acid, sodium benzoate, potassium sorbate, triethanolamine, limonene                                                 |
| <b>G42</b> | (05/03/2022)                               | Hydroalcoholic gel. Leave-on product.                                     | Alcohol Denat, Aqua, Glycerin, Carbomer, Triethanolamine.                                                                                                                                                                                    |
| <b>G43</b> | Exhibition<br>(06/03/2022)<br>(25/03/2022) | Hydroalcoholic gel. Antiseptic. 80% Alcohol.                              | Ethanol 79,8% p/p                                                                                                                                                                                                                            |
| <b>G44</b> | Museum<br>(06/03/2022)                     | Hydroalcoholic gel. Antiseptic for healthy skin. Sanitizer.               | Ethanol 70% p/p, phenoxyethanol 2,1% w/w, didecyldimethylammonium chloride 0.35% w/w, excipients CSP 100%.<br>"Absence of parfum and dyes"<br>UNE-EN 1276, UNE-EN 1650, UNE-EN 14476, UNE-EN 12791, UNE-EN 13624, UNE-EN 14348, UNE-EN 13727 |
| <b>G45</b> | Shopping centre<br>(06/03/2022)            | Hydroalcoholic gel. Antiseptic dermatological gel. Leave-on product.      | "Equilibrada combinación de alcohols, potenciada con desinfectantes a base de biguanida y acondicionadores de la piel".<br>Alcohol etílico, alcohol isopropílico, "exento de perfumes"                                                       |
| <b>G46</b> | Pharmacy<br>(09/03/2022)                   | Hydroalcoholic gel. Antiseptic for healthy skin                           | Ethanol (62 %), isopropanol (10 %), Benzalkonium chloride (0.05 %), excipients, c.s.p. 100%.                                                                                                                                                 |
| <b>G47</b> | Personal use<br>(19/03/2022)               | Hydroalcoholic gel to prevent infections                                  | 70 % alcohol denat, water (aqua), glycerin, hydroxyethylcellulose                                                                                                                                                                            |
| <b>G48</b> | Church/Shop<br>(20/03/2022)                | Sanitizing hydroalcoholic gel                                             | Alcohol denat, aqua, isopropyl alcohol, neopentyl glycol diethylhexanoate, carbomer, parfum, aminomethyl propanol, limonene, hydroxycitronellal, citral, linalool                                                                            |



|     |                                   |                                                                  |                                                                                                                                                                                                                                                                                     |
|-----|-----------------------------------|------------------------------------------------------------------|-------------------------------------------------------------------------------------------------------------------------------------------------------------------------------------------------------------------------------------------------------------------------------------|
| G49 | Hospital<br>(20/03/2022)          | Antiseptic<br>hydroalcoholic<br>gel for healthy<br>skin          | Ethanol 70% w/w, phenoxyethanol 2.1% w/w,<br>didecyldimethylammonium chloride 0.35%<br>w/w,<br>UNE-EN 1276, UNE-EN 1650, UNE-EN 14476,<br>UNE-EN 12791, UNE-EN 13624, UNE-EN<br>14348, UNE-EN 13727                                                                                 |
| G50 | Shop<br>(19/03/2022)              | Hydroalcoholic<br>gel                                            | Alcohol denat, aqua, isopropyl alcohol,<br>glycerin, carbomer, sodium hydroxide.                                                                                                                                                                                                    |
| G51 | Shop<br>(19/03/2022)              | Hydroalcoholic<br>gel                                            | Alcohol denat, aqua, isopropyl alcohol,<br>hydroxyethylcellulose, glycerin.                                                                                                                                                                                                         |
| G52 | Restaurant<br>(19/03/2022)        | Antiseptic<br>hydroalcoholic<br>gel for healthy<br>skin          | Ethanol 42%, propan-2-ol 22%, aqua, peg-15-<br>cocamine, propylene glycol, glycerin,<br>carbomer.<br>UNE-EN 1040, UNE-EN 1500, UNE-EN 1276,<br>UNE-EN 13624, UNE-EN 14476                                                                                                           |
| G53 | Personal use<br>(19/03/2022)      | Hydrating<br>hand sanitizer                                      | Alcohol denat, aqua, aloe barbadensis leaf<br>juice, methyl gluceth-10, parfum,<br>acrylates/C10-30 alkyl acrylate crosspolymer,<br>alpha-isomethylionone, tromethamine,<br>potassium sorbate, citronellol, limonene,<br>linalool, hydroxycitronellol, sodium benzoate,<br>eugenol. |
| G54 | Personal use<br>(19/03/2022)      | Hydroalcoholic<br>gel                                            | Alcohol denat, aqua, glycerin, carbomer,<br>allantoin, triethanolamine.                                                                                                                                                                                                             |
| G55 | Supermarket<br>(25/03/2022)       | Hands<br>hydroalcoholic<br>gel with aloe<br>vera and<br>glycerin | Alcohol Denat., Aqua, Glycerin, Propylene<br>Glycol, Acrylates/ C10-30 Alkyl Acrylate<br>Crosspolymer, Aloe Barbadensis Leaf Juice,<br>Aminomethyl Propanol, Potassium Sorbate,<br>Sodium Benzoate                                                                                  |
| G56 | Laboral use<br>(25/03/2022)       | Hydroalcoholic<br>gel. Hand<br>sanitiser                         | Alcohol Denat, Aqua, Glycerin,<br><b>Phenoxyethanol</b> , Aloe Barbadensis Leaf Juice,<br>Didecyldimonium Chloride.                                                                                                                                                                 |
| G57 | Restaurant<br>(24/03/2022)        | Hand cleaner<br>gel                                              | Alcohol Denat, aqua (water), hydroxypropyl<br>methylcellulose, parfum (fragrance), glycerin,<br>chlorhexidine digluconate, citric acid, sodium<br>chloride, linalool, butylphenyl<br>methylpropional, hexylcinnamal,<br>citronellol, alpha-isomethyl ionone, eugenol,<br>limonene   |
| G58 | Conference centre<br>(24/03/2022) | Hydroalcoholic<br>gel                                            | Isopropanol, hydroxyethylcellulose, glycerin,<br>water                                                                                                                                                                                                                              |
| G59 | Bus<br>(25/03/2022)               | Hydroalcoholic                                                   | Alcohol denat, aqua, isopropyl alcohol, aloe<br>barbadensis leaf extract, polyacrylate<br>cosspolymer-6, parfum                                                                                                                                                                     |
| G60 | Restaurant<br>(25/03/2022)        | Sanitizing gel                                                   | Alcohol, aqua (water), isopropyl alcohol,<br>glycerin, hydroxypropyl methylcellulose,<br>menthol                                                                                                                                                                                    |
| G61 | Restaurant<br>(25/03/2022)        | Antiseptic for<br>healthy skin                                   | 71.5 % ethanol, glycerol, isopropyl, excipients<br>c.s.p 100 %                                                                                                                                                                                                                      |

|            |                               |                                         |                                                                                                                                                                                                                             |
|------------|-------------------------------|-----------------------------------------|-----------------------------------------------------------------------------------------------------------------------------------------------------------------------------------------------------------------------------|
| <b>G62</b> | Restaurant<br>(27/03/2022)    | Hand sanitizer<br>without water         | Alcohol denat, aqua, hydroxyethylcellulose,<br>phenoxyethanol, caprylyl glycol, farnesol,<br>citric acid, sodium hydroxide                                                                                                  |
| <b>G63</b> | Gambling hall<br>(28/03/2022) | Hydroalcoholic<br>gel                   | Alcohol denat, aqua, carbomer, aminomethyl<br>lactate, propylene, glycol                                                                                                                                                    |
| <b>G64</b> | Personal use<br>(24/03/2022)  | Hydroalcoholic<br>gel                   | Alcohol denat, aqua, hydroxyethylcellulose,<br>triethanolamine                                                                                                                                                              |
| <b>G65</b> | Personal use<br>(24/03/2022)  | Hydroalcoholic<br>gel with aloe<br>vera | Alcohol denat, aqua, isopropyl alcohol, aloe<br>barbadensis leaf juice,<br>triethanolamine, carbomer, PEG-40<br>hydrogenated castor oil, trideceth-9,<br>polysorbate-20, potassium sorbate, sodium<br>benzoate, citric acid |
| <b>G66</b> | Personal use<br>(25/03/2022)  | Antiseptic<br>lotion                    | Didecyl dimethyl ammonium chloride 1%, n-<br>propanol 40%, ethanol 14%, isopropanol 6,4%,<br>excipients, aqua c.s.p. 100%                                                                                                   |
| <b>G67</b> | Personal use<br>(25/03/2022)  | Sanitizing<br>lotion                    | Alcohol denat, dimethyl ether, aqua, glycerin,<br>aloe barbadensis leaf juice, potassium sorbate,<br>sodium benzoate                                                                                                        |

**Table S3.** SPME-GC-MS/MS performance. Linearity, precision, recoveries, instrumental detection limits (IDLs) and limits of detection (LODs).

| Compounds                  | Linearity      |                                          | Precision, RSD         |                        | Recovery ±<br>Precision (%<br>RSD) | IDLs<br>(ng L <sup>-1</sup> ) | LODs<br>(ng g <sup>-1</sup> ) |
|----------------------------|----------------|------------------------------------------|------------------------|------------------------|------------------------------------|-------------------------------|-------------------------------|
|                            | R <sup>2</sup> | Linear<br>range<br>(µg L <sup>-1</sup> ) | (%)                    |                        |                                    |                               |                               |
|                            |                |                                          | Intra-<br>day<br>(n=4) | Inter-<br>day<br>(n=5) |                                    |                               |                               |
| <i>Fragrance allergens</i> |                |                                          |                        |                        |                                    |                               |                               |
| Pinene                     | 0.9942         | 0.05-5                                   | 4.5                    | 13                     | 91.3 ± 4.3                         | 1.3                           | 2.8                           |
| Limonene                   | 0.9925         | 0.05-5                                   | 2.9                    | 9.9                    | 75.6 ± 4.3                         | 2.2                           | 2.8                           |
| Benzyl Alcohol             | 0.9922         | 0.05-5                                   | 5.1                    | 13                     | 78.0 ± 3.3                         | 2.4                           | 3.0                           |
| Linalool                   | 0.9990         | 0.05-5                                   | 7.7                    | 10                     | 83.9 ± 1.5                         | 1.0                           | 1.3                           |
| Methyl-2-octynoate         | 0.9961         | 0.05-5                                   | 4.8                    | 6.6                    | 102 ± 2.3                          | 17                            | 27                            |
| Citronellol                | 0.9992         | 0.05-5                                   | 6.6                    | 6.1                    | 99.8 ± 9.3                         | 1.9                           | 3.0                           |
| Citral                     | 0.9939         | 0.05-5                                   | 6.7                    | 8.3                    | 111 ± 3.3                          | 3.7                           | 4.0                           |
| Geraniol                   | 0.9912         | 0.1-5                                    | 9.0                    | 12                     | 103 ± 5.7                          | 1.9                           | 4.3                           |
| Cinnamaldehyde             | 0.9996         | 0.1-5                                    | 11                     | 12                     | 108 ± 12                           | 18                            | 29                            |
| Anise alcohol              | 0.9912         | 0.1-5                                    | 8.0                    | 14                     | 112 ± 3.1                          | 18                            | 33                            |
| Cinnamyl alcohol           | 0.9909         | 0.1-5                                    | 1.1                    | 7.9                    | 108 ± 4.0                          | 17                            | 30                            |
| Eugenol                    | 0.9906         | 0.05-5                                   | 8.5                    | 10                     | 116 ± 3.6                          | 1.6                           | 6.0                           |
| Methyleugenol              | 0.9993         | 0.05-5                                   | 12                     | 11                     | 106 ± 3.0                          | 0.2                           | 1.2                           |
| Isoeugenol                 | 0.9920         | 0.05-5                                   | 5.8                    | 9.9                    | 103 ± 4.8                          | 2.2                           | 2.4                           |
| α-isomethylionone          | 0.9919         | 0.05-5                                   | 9.2                    | 6.0                    | 103 ± 2.9                          | 1.5                           | 2.6                           |
| Lilial®                    | 0.9990         | 0.05-5                                   | 1.7                    | 6.8                    | 108 ± 2.4                          | 0.16                          | 2.7                           |
| Amylcinnamal               | 0.9949         | 0.05-5                                   | 12                     | 14                     | 116 ± 2.4                          | 0.065                         | 2.6                           |
| Amylcinnamyl alcohol       | 0.9942         | 0.05-5                                   | 6.3                    | 16                     | 107 ± 1.3                          | 0.53                          | 1.4                           |
| Farnesol                   | 0.9964         | 0.05-5                                   | 8.7                    | 9.7                    | 112 ± 5.8                          | 0.17                          | 2.8                           |
| Hexylcinnamal              | 0.9964         | 0.05-5                                   | 9.7                    | 12                     | 111 ± 2.6                          | 0.13                          | 1.2                           |
| Benzyl benzoate            | 0.9959         | 0.05-5                                   | 12                     | 9.1                    | 81.5 ± 5.1                         | 0.48                          | 2.8                           |
| Benzyl salicylate          | 0.9989         | 0.05-5                                   | 10                     | 16                     | 96.7 ± 4.0                         | 1.2                           | 2.8                           |
| Benzyl cinnamate           | 0.9901         | 0.05-5                                   | 11                     | 7.9                    | 88.7 ± 4.2                         | 2.3                           | 2.6                           |
| <i>Synthetic musks</i>     |                |                                          |                        |                        |                                    |                               |                               |
| Musk Xylene                | 0.9931         | 0.05-5                                   | 7.8                    | 10                     | 110 ± 6.6                          | 0.50                          | 1.4                           |
| Musk Ambrette              | 0.9954         | 0.05-5                                   | 1.8                    | 12                     | 111 ± 3.2                          | 0.010                         | 1.1                           |
| Musk Moskene               | 0.9977         | 0.05-5                                   | 4.9                    | 7.5                    | 117 ± 2.8                          | 0.026                         | 3.3                           |
| Musk Tibetene              | 0.9926         | 0.05-5                                   | 3.0                    | 8.6                    | 106 ± 1.1                          | 0.055                         | 1.4                           |
| Galaxolide                 | 0.9965         | 0.05-5                                   | 7.9                    | 8.3                    | 96.0 ± 3.9                         | 0.78                          | 2.0                           |
| Celestolide                | 0.9938         | 0.05-5                                   | 7.8                    | 14                     | 98.2 ± 1.8                         | 0.049                         | 1.0                           |
| Phantolide                 | 0.9921         | 0.05-5                                   | 9.7                    | 9.6                    | 95.8 ± 1.4                         | 0.76                          | 3.2                           |
| Cashmeran                  | 0.9959         | 0.05-5                                   | 6.8                    | 16                     | 102 ± 1.9                          | 1.3                           | 2.7                           |
| Traseolide                 | 0.9935         | 0.05-5                                   | 9.7                    | 9.9                    | 95.3 ± 1.6                         | 0.25                          | 1.0                           |
| Tonalide                   | 0.9945         | 0.05-5                                   | 11                     | 7.9                    | 95.4 ± 1.4                         | 0.92                          | 1.1                           |
| Ambrettolide               | 0.9957         | 0.05-5                                   | 3.2                    | 5.9                    | 96.2 ± 2.7                         | 0.060                         | 1.0                           |
| <i>Preservatives</i>       |                |                                          |                        |                        |                                    |                               |                               |
| PhEtOH                     | 0.9980         | 0.1-5                                    | 7.9                    | 4.6                    | 102 ± 2.1                          | 6.2                           | 24                            |
| BHA                        | 0.9989         | 0.05-5                                   | 5.2                    | 5.8                    | 106 ± 3.5                          | 0.17                          | 1.5                           |
| BHT                        | 0.9950         | 0.05-5                                   | 7.3                    | 7.0                    | 104 ± 4.2                          | 0.040                         | 1.0                           |
| TCS                        | 0.9940         | 0.05-5                                   | 9.2                    | 13                     | 103 ± 5.3                          | 0.054                         | 3.2                           |
| MeP                        | 0.9964         | 0.05-5                                   | 5.7                    | 8.0                    | 102 ± 3.0                          | 1.4                           | 6.0                           |
| EtP                        | 0.9943         | 0.1-5                                    | 13                     | 11                     | 102 ± 8.8                          | 17                            | 27                            |
| iPrP                       | 0.9901         | 0.05-5                                   | 5.1                    | 4.1                    | 75.9 ± 4.2                         | 4.3                           | 13                            |

|                     |        |        |     |     |            |       |     |
|---------------------|--------|--------|-----|-----|------------|-------|-----|
| PrP                 | 0.9959 | 0.2-5  | 11  | 5.1 | 99.4 ± 7.7 | 15    | 65  |
| iBuP                | 0.9965 | 0.1-5  | 12  | 16  | 96.0 ± 15  | 9.0   | 26  |
| BzP                 | 0.9939 | 0.05-5 | 2.7 | 11  | 97.3 ± 5.9 | 2.0   | 7.1 |
| <i>Plasticizers</i> |        |        |     |     |            |       |     |
| DMP                 | 0.9923 | 0.02-5 | 12  | 11  | 106 ± 8.2  | 3.3   | 7.0 |
| DEP                 | 0.9943 | 0.1-5  | 5.7 | 13  | n.c.       | 0.90  | 35  |
| DIBP                | 0.9971 | 0.05-5 | 3.3 | 9.4 | 103 ± 4.6  | 0.039 | 7.1 |
| DBP                 | 0.9919 | 0.05-5 | 8.8 | 8.9 | 102 ± 4.2  | 0.33  | 2.5 |
| DMEP                | 0.9940 | 0.05-5 | 11  | 14  | 94.9 ± 4.0 | 12    | 14  |
| DIPP                | 0.9945 | 0.05-5 | 10  | 7.9 | 97.9 ± 5.2 | 1.9   | 3.3 |
| DPP                 | 0.9949 | 0.05-5 | 12  | 10  | 82.2 ± 6.7 | 0.51  | 3.5 |
| BBP                 | 0.9911 | 0.05-5 | 9.6 | 7.0 | 100 ± 6.9  | 0.85  | 4.1 |
| DIHP                | 0.9982 | 0.05-5 | 4.7 | 8.2 | 107 ± 4.3  | 6.4   | 10  |
| DEHP                | 0.9937 | 0.1-5  | 8.2 | 13  | 116 ± 2.5  | 3.4   | 26  |
| DCHP                | 0.9980 | 0.05-5 | 8.2 | 5.8 | 95.4 ± 2.0 | 0.26  | 8.2 |
| DPhP                | 0.9931 | 0.2-5  | 10  | 11  | 119 ± 5.2  | 0.71  | 34  |
| DNOP                | 0.9919 | 0.05-5 | 6.9 | 13  | 107 ± 5.3  | 4.3   | 14  |
| DMA                 | 0.9922 | 0.05-5 | 6.8 | 11  | 81.6 ± 7.6 | 3.9   | 14  |
| DEA                 | 0.9929 | 0.05-5 | 6.4 | 8.3 | 90.9 ± 6.7 | 3.7   | 1.0 |
| DEHA                | 0.9956 | 0.1-5  | 3.7 | 4.7 | 99.0 ± 10  | 0.39  | 20  |

**Figure S1.** Comparison of the recoveries obtained for fortified hydroalcoholic gel sample free of target compounds (except DEP) at two levels:  $0.2 \mu\text{g g}^{-1}$  and  $2 \mu\text{g g}^{-1}$ .

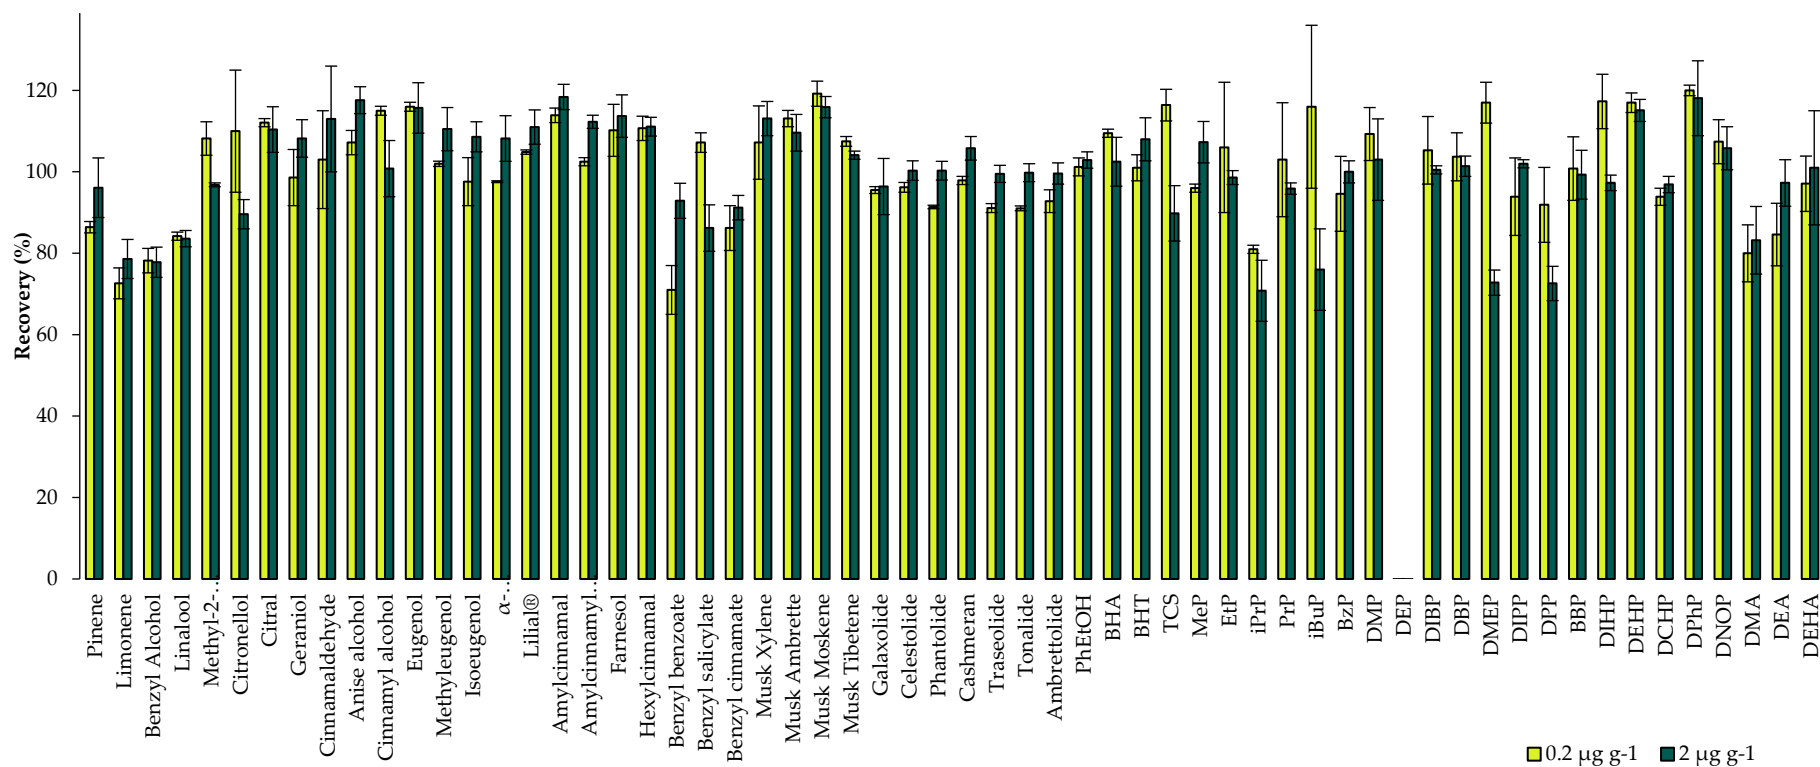

Supplement: s1 [file s1]
